# Supplementary material for: Floral plasticity: Herbivore‐species‐specific‐induced changes in flower traits with contrasting effects on pollinator visitation
Source: PubMed Central journal article supplement (PMC6850075; doi:10.1111/pce.13520), 2019-03-08
Supplement: PCE-42-1882-s001.pdf [file PCE-42-1882-s001.pdf]

## Supporting Information

### Floral plasticity: Herbivore-species-specific induced changes in flower traits with contrasting effects on pollinator visitation.

Quint Rusman<sup>1</sup>, Erik H. Poelman<sup>1</sup>, Farzana Nowrin<sup>1,2</sup>, Gerrit Polder<sup>3</sup>, and Dani Lucas-Barbosa<sup>1,4</sup>

<sup>1</sup>Laboratory of Entomology, Wageningen University, P.O. Box 16, 6700 AA Wageningen, The Netherlands

<sup>2</sup>Current address: Entomology Division, Bangladesh Rice Research Institute, Gazipur-1701, Bangladesh

<sup>3</sup> Wageningen UR Greenhouse Horticulture, P.O. Box 644, 6700 AP Wageningen, The Netherlands

<sup>4</sup>Current address: Bio-communication & Ecology, ETH Zürich, Schmelzbergstrasse 9, 8092 Zürich, Switzerland

Corresponding author: [quint.rusman@wur.nl](mailto:quint.rusman@wur.nl)

The following figures and tables are included in the supporting information:

**Table S1.** Specifications of the eight filters of the multispectral camera used to photograph flowers of herbivore-infested and uninfested *Brassica nigra* plants.

**Fig. S1.** Number of flowers (a) and inflorescences (b) of *B. nigra* plants infested with different herbivores or uninfested plants.

**Fig. S2.** Morphometries for flowers of uninfested *B. nigra* plants and plants infested with different herbivores.

**Fig. S3.** Morphometries for petals of uninfested *B. nigra* plants and plants infested with different herbivores.

**Fig. S4.** Principal component analysis of the colour profile of the top (green) and base (red) part of petals of *B. nigra* plants.

**Fig. S5.** Reflectance spectra with relative diffuse reflectance of wavelengths (300-700nm) of the top (a) and base (b) part of petals of *B. nigra* plants infested with different herbivores or uninfested plants.

**Table S2.** Confusion matrices of support vector machine classifiers for the reflectance spectra of top parts of petals of uninfested *B. nigra* plants of plants infested with different herbivores (a) or herbivore functional groups (HFGs) (b).

**Table S3.** Confusion matrices of support vector machine classifiers for the reflectance spectra of base parts of petals of uninfested *B. nigra* plants of plants infested with different herbivores (a) or herbivore functional groups (HFGs) (b).

**Fig. S6.** Total volatile emission of uninfested flowering *B. nigra* plants and plants infested with different herbivores.

**Table S4.** Volatile compounds of uninfested flowering *B. nigra* plants or plants infested with different herbivores.

**Fig. S7.** Dendrogram and heat map of the emission of volatile compounds for each compound class of *Brassica nigra* plants infested with different herbivores or uninfested plants.

**Fig. S8.** Size of pollen grains of uninfested *B. nigra* plants or plants infested with different herbivores.

**Fig. S9.** Size distribution of pollen grains of uninfested *B. nigra* plants or plants infested with different herbivores.

**Fig. S10.** Preference of the syrphid fly *Episyrphus balteatus* for uninfested *B. nigra* plants or plants infested with different herbivores.

Table S1. Specifications of the eight filters of the multispectral camera used to photograph flowers of herbivore-infested and uninfested *Brassica nigra* plants.

| Filter | Wavelength [nm] | Bandwidth [nm] | Exposure [ms] | Gain [dB] |
|--------|-----------------|----------------|---------------|-----------|
| 1      | 425             | 50             | 20            | 100       |
| 2      | 466             | 21             | 30            | 0         |
| 3      | 500             | 20             | 10            | 0         |
| 4      | 542             | 10             | 7             | 0         |
| 5      | 570             | 50             | 1             | 0         |
| 6      | 601             | 13             | 3             | 0         |
| 7      | 640             | 20             | 3             | 0         |
| 8      | 680             | 20             | 3             | 0         |

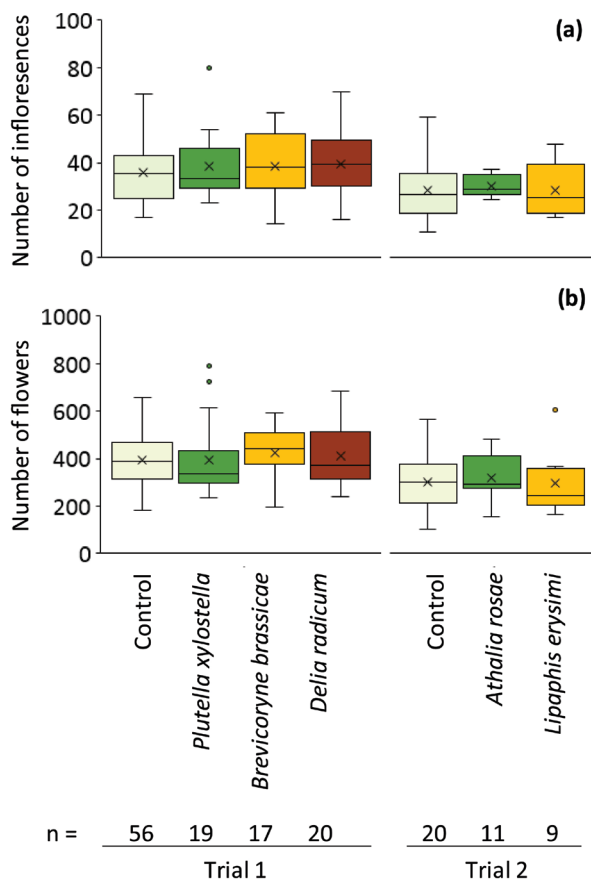

Fig. S1 Number of flowers (a) and inflorescences (b) of *Brassica nigra* plants infested with different herbivores or uninfested plants. Boxplots show median (line), mean (x), 1<sup>st</sup> and 3<sup>rd</sup> quartiles, minimum and maximum. Outliers (1.5 times the interquartile range below the 1<sup>st</sup> or above the 3<sup>rd</sup> quartile) are represented by circles. Flowers and inflorescences were counted after seven days of herbivory.

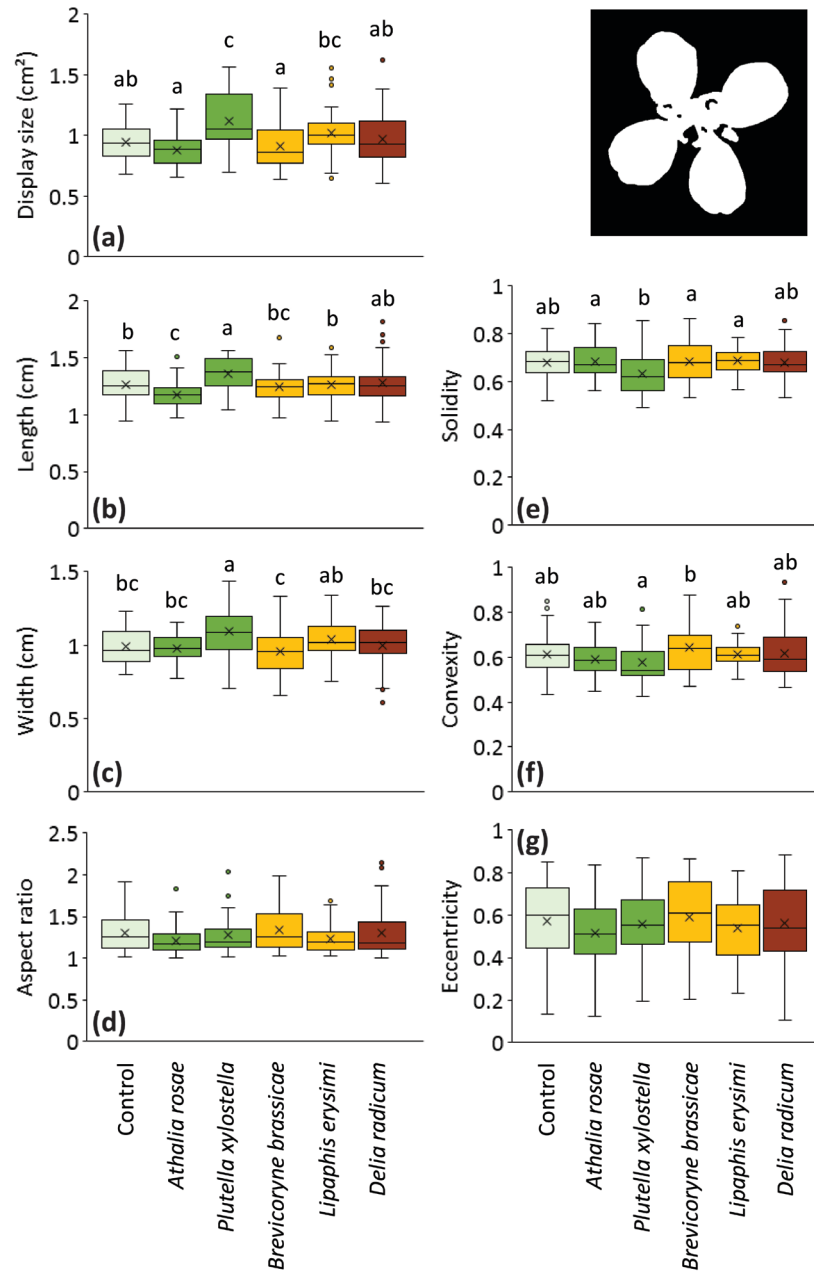

Fig. S2 Morphometry for flowers of uninfested *Brassica nigra* plants and plants infested with different herbivores. We measured a) display size, b) length, c) width, d) aspect ratio, e) solidity, f) convexity, and g) eccentricity. Boxplots show median (line), mean (x), 1<sup>st</sup> and 3<sup>rd</sup> quartiles, minimum and maximum. Outliers (1.5 times the interquartile range below the 1<sup>st</sup> or above the 3<sup>rd</sup> quartile) are represented by circles. Measurements were taken after seven days of herbivory. Number of replicates per herbivore treatment varied between seven and eight plants, and six flowers were measured from each plant. Letters above bars indicate significant differences at  $\alpha = 0.05$  based on Tukey's *post hoc* tests.

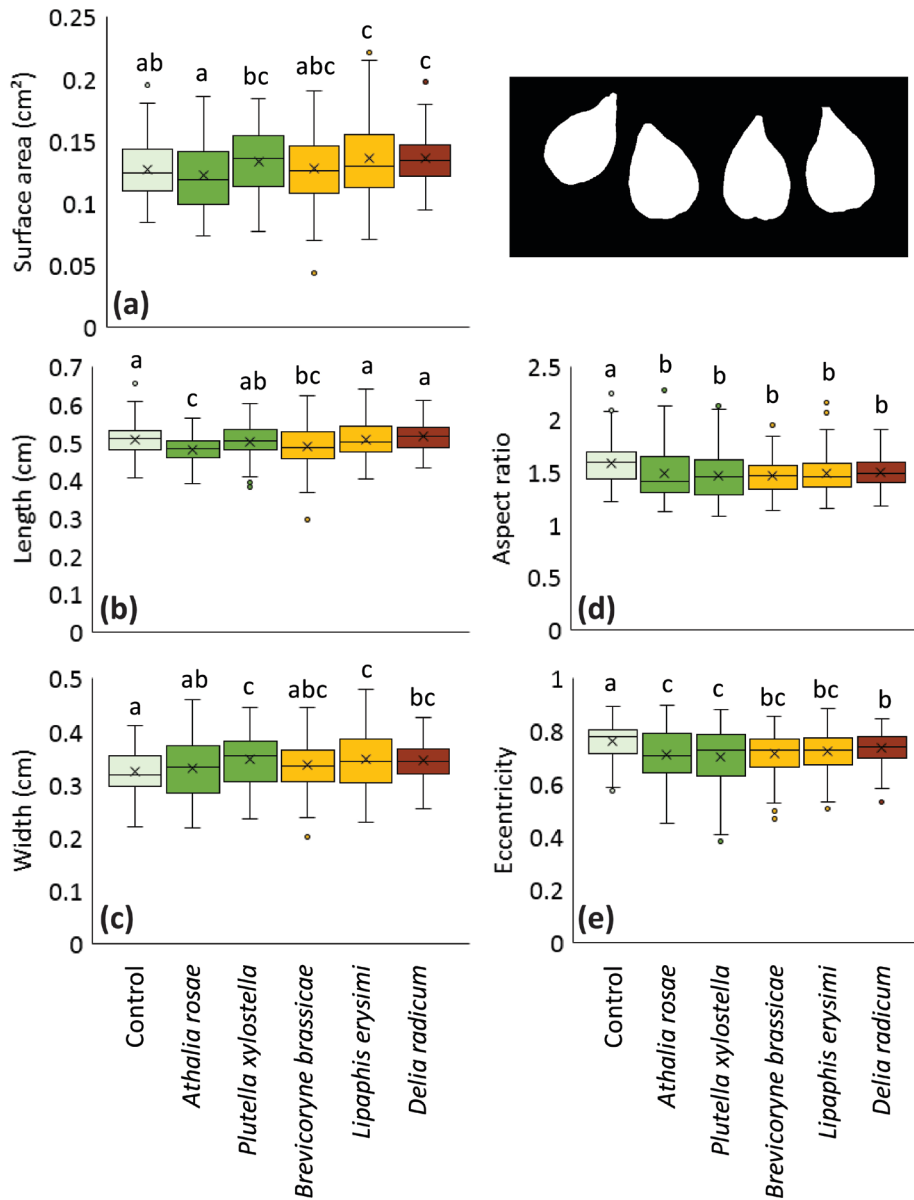

Fig. S3 Morphometry for petals of uninfested *Brassica nigra* plants and plants infested with different herbivores. We measured a) surface area, b) major chord length, c) minor chord length, d) aspect ratio, and e) eccentricity. Boxplots show median (line), mean (x), 1<sup>st</sup> and 3<sup>rd</sup> quartiles, minimum and maximum. Outliers (1.5 times the interquartile range below the 1<sup>st</sup> or above the 3<sup>rd</sup> quartile) are represented by circles. Measurements were taken after seven days of herbivory, by taking pictures of all petals from each flower and subsequent software processing. Number of replicates per herbivore treatment varied between seven and eight plants, six flowers were used from each plant. Letters above bars indicate significant differences at  $\alpha = 0.05$  based on Tukey's *post hoc* tests.

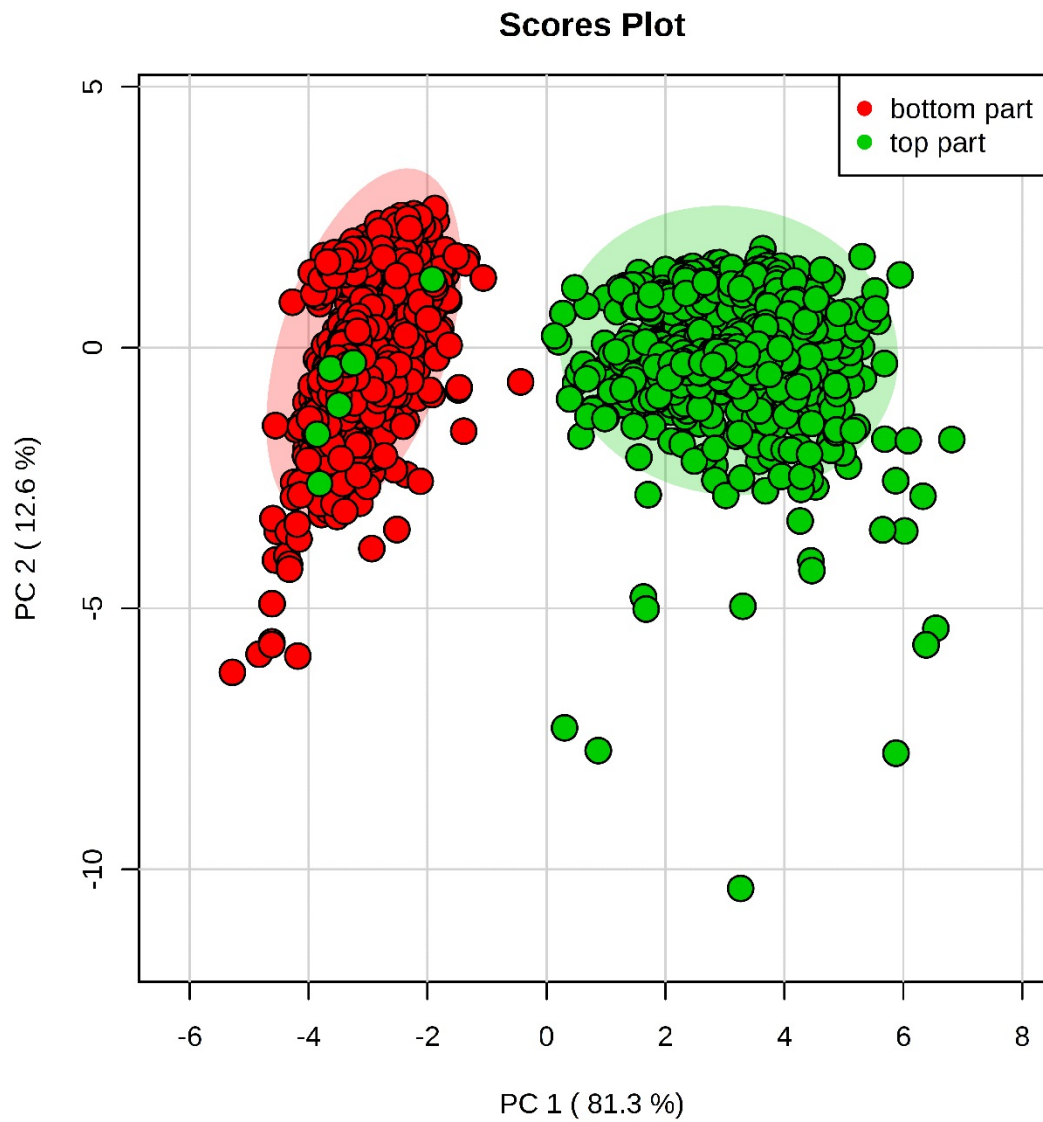

Fig. S4 Principal component analysis of the color profile of the top (green) and base (red) part of petals of *Brassica nigra* flowers. Highlighted areas denote 95% confidence intervals. Reflectance spectra measurements were done after seven days of herbivory. In total, the top and base parts of 1080 petals were measured, from 270 flowers from 45 plants.

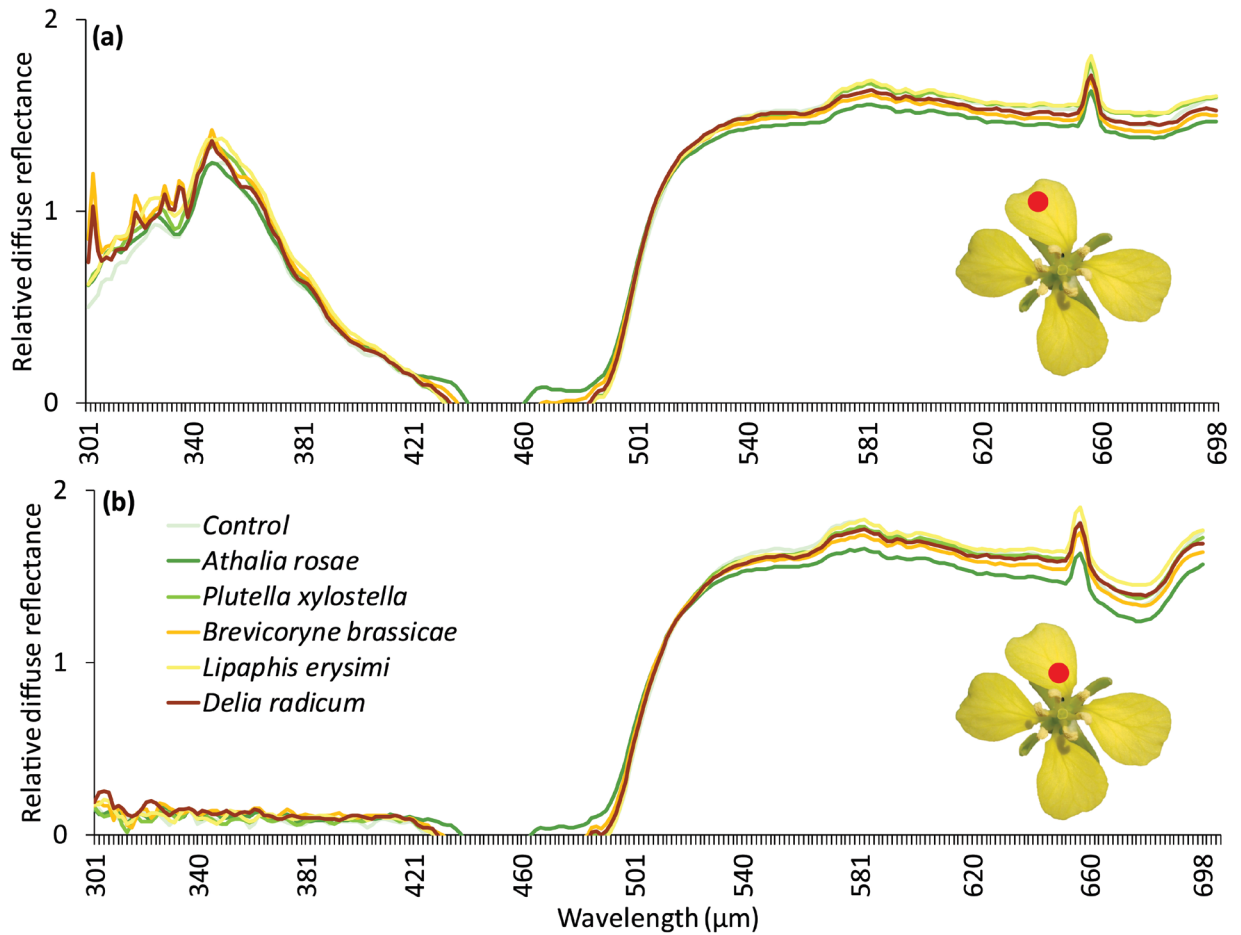

Fig. S5 Reflectance spectra with relative diffuse reflectance of wavelengths (300-700 nm) of the top (a) and base (b) part of petals of *Brassica nigra* plants infested with different herbivores or uninfested plants. The flower with the red dot indicates where measurements were taken (top or base), which was done after seven days of herbivory. Number of replicates per herbivore treatment varied between six and eight plants, and from each plant, all four petals of six flowers were measured.

Table S2. Confusion matrices of support vector machine classifiers for the reflectance spectra of top parts of petals of uninfested *Brassica nigra* plants or plants infested with different herbivores (a) or herbivore functional groups (HFGs) (b). Herbivore functional groups were assigned as followed: Chewing herbivores: *Athalia rosae* and *Plutella xylostella*; sap-feeding herbivores: *Brevicoryne brassicae* and *Lipaphis erysimi*; root herbivores: *Delia radicum*. The models assigned individual herbivore species to the correct HFGs (c) and *vice versa* (d) based on the reflectance spectra. The flower with the red dot indicates where measurements were taken (top or base), which was done after seven days of herbivory. Number of replicates per herbivore treatment varied between six and eight plants, and from each plant, all four petals of six flowers were measured.

| (a)<br>Predicted by SVM model | True label |                      |                            |                              |                         |                      |
|-------------------------------|------------|----------------------|----------------------------|------------------------------|-------------------------|----------------------|
|                               | Control    | <i>Athalia rosae</i> | <i>Plutella xylostella</i> | <i>Brevicoryne brassicae</i> | <i>Lipaphis erysimi</i> | <i>Delia radicum</i> |
| Control                       | 57         | 1                    | 0                          | 0                            | 1                       | 0                    |
| <i>Athalia rosae</i>          | 0          | 41                   | 7                          | 0                            | 0                       | 0                    |
| <i>Plutella xylostella</i>    | 0          | 4                    | 43                         | 1                            | 0                       | 0                    |
| <i>Brevicoryne brassicae</i>  | 0          | 0                    | 1                          | 31                           | 6                       | 0                    |
| <i>Lipaphis erysimi</i>       | 1          | 0                    | 0                          | 8                            | 42                      | 0                    |
| <i>Delia radicum</i>          | 0          | 0                    | 0                          | 0                            | 1                       | 43                   |

|            |      |
|------------|------|
| Accuracy   | 89 % |
| Error rate | 10 % |

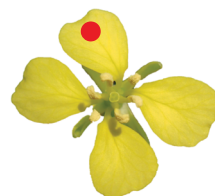

| (c)<br>Predicted by SVM model | True label |                      |                            |                              |                         |                      |
|-------------------------------|------------|----------------------|----------------------------|------------------------------|-------------------------|----------------------|
|                               | Control    | <i>Athalia rosae</i> | <i>Plutella xylostella</i> | <i>Brevicoryne brassicae</i> | <i>Lipaphis erysimi</i> | <i>Delia radicum</i> |
| Control                       | 56         | 0                    | 0                          | 0                            | 1                       | 0                    |
| Chewing herbivores            | 1          | 46                   | 50                         | 1                            | 0                       | 0                    |
| Sap-feeding herbivores        | 1          | 0                    | 1                          | 39                           | 48                      | 0                    |
| Root herbivores               | 0          | 0                    | 0                          | 0                            | 0                       | 43                   |

|          |      |
|----------|------|
| Accuracy | 97 % |
|----------|------|

| (b)<br>Predicted by SVM model | True label |                    |                        |                 |
|-------------------------------|------------|--------------------|------------------------|-----------------|
|                               | Control    | Chewing herbivores | Sap-feeding herbivores | Root herbivores |
| Control                       | 56         | 0                  | 1                      | 0               |
| Chewing herbivores            | 1          | 96                 | 1                      | 0               |
| Sap-feeding herbivores        | 1          | 1                  | 87                     | 0               |
| Root herbivores               | 0          | 0                  | 0                      | 43              |

|            |      |
|------------|------|
| Accuracy   | 98 % |
| Error rate | 2 %  |

| (d)<br>Predicted by SVM model | True label |                    |                        |                 |
|-------------------------------|------------|--------------------|------------------------|-----------------|
|                               | Control    | Chewing herbivores | Sap-feeding herbivores | Root herbivores |
| Control                       | 57         | 1                  | 1                      | 0               |
| <i>Athalia rosae</i>          | 0          | 48                 | 0                      | 0               |
| <i>Plutella xylostella</i>    | 0          | 47                 | 1                      | 0               |
| <i>Brevicoryne brassicae</i>  | 0          | 1                  | 38                     | 0               |
| <i>Lipaphis erysimi</i>       | 1          | 0                  | 49                     | 0               |
| <i>Delia radicum</i>          | 0          | 0                  | 0                      | 43              |

|          |      |
|----------|------|
| Accuracy | 91 % |
|----------|------|

Table S3. Confusion matrices of support vector machine classifiers for the reflectance spectra of base parts of petals of uninfested *Brassica nigra* plants or plants infested with different herbivores (a) or herbivore functional groups (HFGs) (b). Herbivore functional groups were assigned as followed: Chewing herbivores: *Athalia rosae* and *Plutella xylostella*; sap-feeding herbivores: *Brevicoryne brassicae* and *Lipaphis erysimi*; root herbivores: *Delia radicum*. The models assigned individual herbivore species to the correct HFGs (c) and *vice versa* (d) based on the reflectance spectra. The flower with the red dot indicates where measurements were taken (top or base), which was done after seven days of herbivory. Number of replicates per herbivore treatment varied between six and eight plants, and from each plant, all four petals of six flowers were measured.

| (a)<br>Predicted by SVM model | True label |                      |                            |                              |                         |                      |
|-------------------------------|------------|----------------------|----------------------------|------------------------------|-------------------------|----------------------|
|                               | Control    | <i>Athalia rosae</i> | <i>Plutella xylostella</i> | <i>Brevicoryne brassicae</i> | <i>Lipaphis erysimi</i> | <i>Delia radicum</i> |
| Control                       | 63         | 0                    | 1                          | 0                            | 2                       | 0                    |
| <i>Athalia rosae</i>          | 0          | 38                   | 8                          | 0                            | 0                       | 0                    |
| <i>Plutella xylostella</i>    | 0          | 8                    | 39                         | 0                            | 0                       | 0                    |
| <i>Brevicoryne brassicae</i>  | 1          | 0                    | 2                          | 31                           | 5                       | 0                    |
| <i>Lipaphis erysimi</i>       | 1          | 0                    | 0                          | 4                            | 43                      | 2                    |
| <i>Delia radicum</i>          | 0          | 0                    | 0                          | 0                            | 0                       | 38                   |

|            |      |
|------------|------|
| Accuracy   | 83 % |
| Error rate | 12 % |

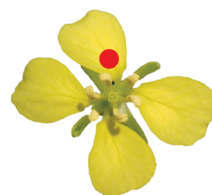

| (c)<br>Predicted by SVM model | True label |                      |                            |                              |                         |                      |
|-------------------------------|------------|----------------------|----------------------------|------------------------------|-------------------------|----------------------|
|                               | Control    | <i>Athalia rosae</i> | <i>Plutella xylostella</i> | <i>Brevicoryne brassicae</i> | <i>Lipaphis erysimi</i> | <i>Delia radicum</i> |
| Control                       | 64         | 0                    | 0                          | 0                            | 1                       | 0                    |
| Chewing herbivores            | 0          | 46                   | 47                         | 0                            | 0                       | 0                    |
| Sap-feeding herbivores        | 1          | 0                    | 4                          | 35                           | 49                      | 2                    |
| Root herbivores               | 0          | 0                    | 0                          | 0                            | 0                       | 38                   |

|          |      |
|----------|------|
| Accuracy | 93 % |
|----------|------|

| (b)<br>Predicted by SVM model | True label |                    |                        |                 |
|-------------------------------|------------|--------------------|------------------------|-----------------|
|                               | Control    | Chewing herbivores | Sap-feeding herbivores | Root herbivores |
| Control                       | 64         | 0                  | 1                      | 0               |
| Chewing herbivores            | 0          | 92                 | 0                      | 0               |
| Sap-feeding herbivores        | 1          | 4                  | 84                     | 2               |
| Root herbivores               | 0          | 0                  | 0                      | 38              |

|            |      |
|------------|------|
| Accuracy   | 92 % |
| Error rate | 4 %  |

| (d)<br>Predicted by SVM model | True label |                    |                        |                 |
|-------------------------------|------------|--------------------|------------------------|-----------------|
|                               | Control    | Chewing herbivores | Sap-feeding herbivores | Root herbivores |
| Control                       | 63         | 1                  | 2                      | 0               |
| <i>Athalia rosae</i>          | 0          | 46                 | 0                      | 0               |
| <i>Plutella xylostella</i>    | 0          | 47                 | 0                      | 0               |
| <i>Brevicoryne brassicae</i>  | 1          | 2                  | 36                     | 0               |
| <i>Lipaphis erysimi</i>       | 1          | 0                  | 47                     | 2               |
| <i>Delia radicum</i>          | 0          | 0                  | 0                      | 38              |

|          |      |
|----------|------|
| Accuracy | 84 % |
|----------|------|



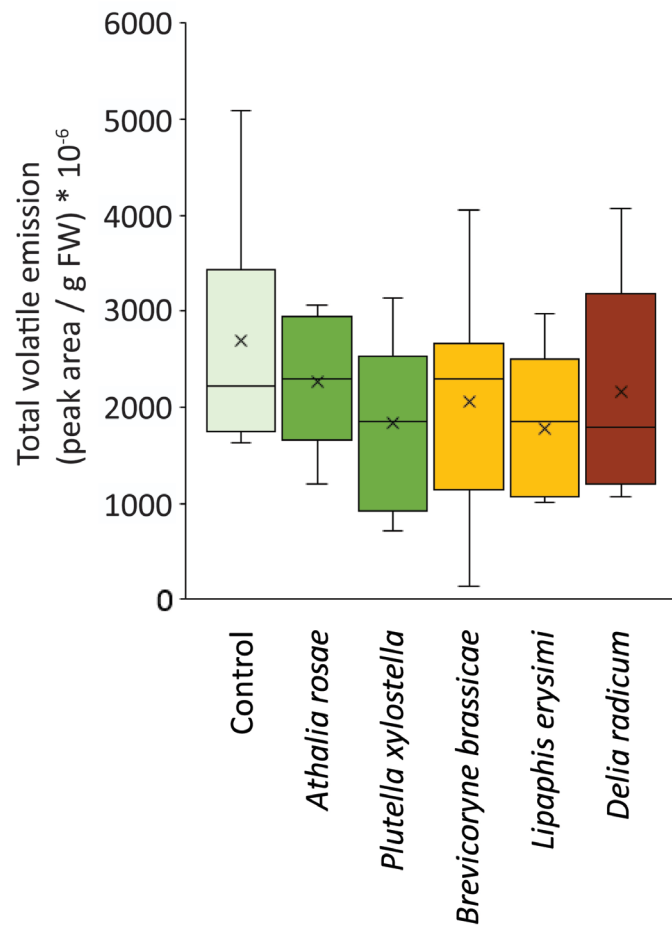

Fig. S6 Total volatile emission (peak area/ g FW) of uninfested flowering *Brassica nigra* plants and plants infested with different herbivores. Boxplots show median (line), mean (x), 1<sup>st</sup> and 3<sup>rd</sup> quartiles, minimum and maximum. Volatiles were collected after seven days of herbivory. Number of replicates per herbivore treatment varied between seven and nine plants.

Table S4. Volatile compounds of uninfested flowering *Brassica nigra* plants or plants infested with different herbivores. Volatiles were collected after seven days of herbivory. Peak area of volatile emission for each compound was corrected by g FW and divided by  $10^5$ . Number of replicates per herbivore treatment varied between seven and nine plants.

| Putatively identified volatile compounds         | Arithmetic Index* | Uninfested control | <i>Athalia rosae</i> | <i>Plutella xylostella</i> | <i>Brevicoryne brassicae</i> | <i>Lipaphis erysimi</i> | <i>Delia radicum</i> |
|--------------------------------------------------|-------------------|--------------------|----------------------|----------------------------|------------------------------|-------------------------|----------------------|
|                                                  |                   | Peak area / g FW   | Peak area / g FW     | Peak area / g FW           | Peak area / g FW             | Peak area / g FW        | Peak area / g FW     |
|                                                  |                   | Mean $\pm$ SD      | Mean $\pm$ SD        | Mean $\pm$ SD              | Mean $\pm$ SD                | Mean $\pm$ SD           | Mean $\pm$ SD        |
| <b>Benzenoids and phenylpropanoids</b>           |                   |                    |                      |                            |                              |                         |                      |
| Benzaldehyde                                     | <b>971</b>        | 3529 $\pm$ 2601    | 2181 $\pm$ 765       | 2334 $\pm$ 1368            | 1940 $\pm$ 954               | 2198 $\pm$ 1311         | 2345 $\pm$ 1032      |
| Benzyl alcohol                                   | <b>1039</b>       | 1048 $\pm$ 1228    | 787 $\pm$ 339        | 607 $\pm$ 417              | 615 $\pm$ 435                | 782 $\pm$ 532           | 898 $\pm$ 383        |
| Phenylacetaldehyde                               | <b>1053</b>       | 2848 $\pm$ 3490    | 1829 $\pm$ 1690      | 1265 $\pm$ 1402            | 1664 $\pm$ 979               | 1377 $\pm$ 1402         | 1328 $\pm$ 1294      |
| Benzyl acetate                                   | <b>1148</b>       | 39 $\pm$ 62        | 23 $\pm$ 18          | 18 $\pm$ 17                | 20 $\pm$ 12                  | 26 $\pm$ 27             | 28 $\pm$ 21          |
| Methyl salicylate                                | <b>1207</b>       | 45 $\pm$ 97        | 10 $\pm$ 5           | 17 $\pm$ 29                | 31 $\pm$ 55                  | 12 $\pm$ 11             | 15 $\pm$ 9           |
| p-Anisaldehyde                                   | <b>1269</b>       | 2227 $\pm$ 2418    | 1357 $\pm$ 631       | 1597 $\pm$ 1137            | 1074 $\pm$ 606               | 1106 $\pm$ 1099         | 1152 $\pm$ 734       |
| <b>Monoterpenoids</b>                            |                   |                    |                      |                            |                              |                         |                      |
| $\alpha$ -Thujene                                | <b>932</b>        | 810 $\pm$ 588      | 662 $\pm$ 329        | 390 $\pm$ 290              | 569 $\pm$ 458                | 435 $\pm$ 350           | 568 $\pm$ 454        |
| $\alpha$ -Pinene                                 | <b>943</b>        | 1423 $\pm$ 556     | 1520 $\pm$ 373       | 1274 $\pm$ 827             | 1222 $\pm$ 618               | 1256 $\pm$ 454          | 1368 $\pm$ 409       |
| Camphene                                         | <b>960</b>        | 549 $\pm$ 622      | 332 $\pm$ 301        | 193 $\pm$ 161              | 429 $\pm$ 404                | 212 $\pm$ 188           | 297 $\pm$ 361        |
| Sabinene                                         | <b>981</b>        | 889 $\pm$ 428      | 807 $\pm$ 361        | 501 $\pm$ 367              | 643 $\pm$ 424                | 568 $\pm$ 330           | 679 $\pm$ 467        |
| $\beta$ -Pinene                                  | <b>989</b>        | 286 $\pm$ 145      | 236 $\pm$ 132        | 176 $\pm$ 126              | 200 $\pm$ 143                | 172 $\pm$ 104           | 216 $\pm$ 172        |
| $\beta$ -Myrcene                                 | <b>991</b>        | 382 $\pm$ 257      | 329 $\pm$ 121        | 193 $\pm$ 128              | 238 $\pm$ 159                | 246 $\pm$ 153           | 255 $\pm$ 172        |
| $\alpha$ -Phellandrene                           | <b>1015</b>       | 212 $\pm$ 147      | 178 $\pm$ 94         | 95 $\pm$ 76                | 145 $\pm$ 119                | 118 $\pm$ 100           | 146 $\pm$ 114        |
| $\alpha$ -Terpinene                              | <b>1025</b>       | 119 $\pm$ 173      | 64 $\pm$ 56          | 36 $\pm$ 38                | 67 $\pm$ 75                  | 35 $\pm$ 31             | 59 $\pm$ 68          |
| p-Cymene                                         | <b>1033</b>       | 2 $\pm$ 2          | 1 $\pm$ 1            | 1 $\pm$ 1                  | 1 $\pm$ 1                    | 1 $\pm$ 1               | 1 $\pm$ 1            |
| $\beta$ -Ocimene, ( <i>E</i> )-                  | <b>1050</b>       | 979 $\pm$ 566      | 623 $\pm$ 630        | 323 $\pm$ 430              | 708 $\pm$ 632                | 409 $\pm$ 562           | 641 $\pm$ 731        |
| $\gamma$ -Terpinene                              | <b>1065</b>       | 66 $\pm$ 72        | 45 $\pm$ 33          | 26 $\pm$ 20                | 41 $\pm$ 38                  | 28 $\pm$ 22             | 39 $\pm$ 39          |
| Terpinolene                                      | <b>1094</b>       | 276 $\pm$ 279      | 195 $\pm$ 127        | 102 $\pm$ 87               | 168 $\pm$ 150                | 120 $\pm$ 89            | 168 $\pm$ 156        |
| $\alpha$ -Pinene oxide                           | <b>1115</b>       | 21 $\pm$ 20        | 27 $\pm$ 28          | 9 $\pm$ 9                  | 25 $\pm$ 35                  | 20 $\pm$ 24             | 12 $\pm$ 9           |
| Alloocimene, neo                                 | <b>1131</b>       | 1319 $\pm$ 603     | 1061 $\pm$ 490       | 839 $\pm$ 610              | 935 $\pm$ 678                | 774 $\pm$ 415           | 1028 $\pm$ 678       |
| 2,6-Dimethyl-1,3,5,7-octatetraene, ( <i>Z</i> )- | <b>1136</b>       | 53 $\pm$ 39        | 30 $\pm$ 29          | 32 $\pm$ 45                | 40 $\pm$ 36                  | 22 $\pm$ 31             | 34 $\pm$ 34          |
| $\beta$ -Ocimene epoxide, ( <i>E</i> )-          | <b>1142</b>       | 32 $\pm$ 11        | 14 $\pm$ 9           | 22 $\pm$ 18                | 42 $\pm$ 59                  | 17 $\pm$ 12             | 27 $\pm$ 22          |
| Verbenol, ( <i>E</i> )                           | <b>1158</b>       | 57 $\pm$ 27        | 38 $\pm$ 29          | 22 $\pm$ 25                | 40 $\pm$ 35                  | 21 $\pm$ 18             | 26 $\pm$ 15          |
| Pinocarpone                                      | <b>1178</b>       | 76 $\pm$ 67        | 51 $\pm$ 37          | 35 $\pm$ 41                | 54 $\pm$ 43                  | 32 $\pm$ 24             | 39 $\pm$ 37          |
| $\alpha$ -Terpineol                              | <b>1207</b>       | 143 $\pm$ 122      | 87 $\pm$ 58          | 61 $\pm$ 56                | 64 $\pm$ 43                  | 57 $\pm$ 35             | 78 $\pm$ 51          |
| Myrtenal                                         | <b>1211</b>       | 96 $\pm$ 84        | 64 $\pm$ 42          | 44 $\pm$ 49                | 66 $\pm$ 53                  | 39 $\pm$ 26             | 52 $\pm$ 48          |
| Verbenone                                        | <b>1225</b>       | 514 $\pm$ 253      | 540 $\pm$ 231        | 203 $\pm$ 182              | 294 $\pm$ 218                | 402 $\pm$ 387           | 532 $\pm$ 326        |

| Putatively identified volatile compounds                    | Arithmetic Index* | Uninfested control | <i>Athalia rosae</i> | <i>Plutella xylostella</i> | <i>Brevicoryne brassicae</i> | <i>Lipaphis erysimi</i> | <i>Delia radicum</i> |
|-------------------------------------------------------------|-------------------|--------------------|----------------------|----------------------------|------------------------------|-------------------------|----------------------|
|                                                             |                   | Peak area / g FW   | Peak area / g FW     | Peak area / g FW           | Peak area / g FW             | Peak area / g FW        | Peak area / g FW     |
|                                                             |                   | Mean ± SD          | Mean ± SD            | Mean ± SD                  | Mean ± SD                    | Mean ± SD               | Mean ± SD            |
| <b>Homoterpenoids</b>                                       |                   |                    |                      |                            |                              |                         |                      |
| 4,8-Dimethyl-1,3,7-nonatriene, ( <i>E</i> )-                | <b>1115</b>       | 303 ± 310          | 458 ± 243            | 435 ± 459                  | 266 ± 122                    | 197 ± 133               | 518 ± 675            |
| 4,8,12-Trimethyltrideca-1,3,7,11-tetraene, ( <i>E, E</i> )- | <b>1578</b>       | 34 ± 17            | 93 ± 118             | 174 ± 209                  | 241 ± 307                    | 61 ± 61                 | 40 ± 41              |
| <b>Sesquiterpenoids</b>                                     |                   |                    |                      |                            |                              |                         |                      |
| 7- $\alpha$ -H-Silphiperfol-5-ene                           | <b>1347</b>       | 52 ± 58            | 48 ± 67              | 103 ± 133                  | 51 ± 78                      | 30 ± 16                 | 117 ± 209            |
| Presilphiperfol-7-ene                                       | <b>1355</b>       | 2 ± 2              | 4 ± 6                | 4 ± 5                      | 3 ± 5                        | 3 ± 4                   | 3 ± 4                |
| 7- $\beta$ -H-Silphiperfol-5-ene                            | <b>1367</b>       | 14 ± 16            | 14 ± 21              | 38 ± 49                    | 10 ± 12                      | 9 ± 5                   | 80 ± 190             |
| Silphiperfol-6-ene                                          | <b>1371</b>       | 8 ± 9              | 8 ± 12               | 21 ± 28                    | 6 ± 7                        | 5 ± 3                   | 48 ± 116             |
| Silphiperfol-5,7(14)-diene                                  | <b>1378</b>       | 1 ± 1              | 1 ± 1                | 3 ± 5                      | 1 ± 2                        | 1 ± 0.3                 | 7 ± 17               |
| $\beta$ -Caryophyllene                                      | <b>1446</b>       | 3 ± 1              | 11 ± 12              | 12 ± 16                    | 5 ± 8                        | 3 ± 1                   | 19 ± 39              |
| $\alpha$ -Farnesene, ( <i>Z, E</i> )-                       | <b>1493</b>       | 91 ± 40            | 79 ± 71              | 129 ± 194                  | 71 ± 71                      | 52 ± 50                 | 73 ± 40              |
| $\alpha$ -Farnesene, ( <i>E, E</i> )-                       | <b>1508</b>       | 134 ± 107          | 131 ± 120            | 68 ± 58                    | 112 ± 89                     | 67 ± 90                 | 108 ± 100            |
| <b>Fatty-acid and/or amino-acid derivatives</b>             |                   |                    |                      |                            |                              |                         |                      |
| 3-Hexen-1-ol, acetate, ( <i>Z</i> )-                        | <b>1004</b>       | 385 ± 251          | 554 ± 235            | 410 ± 355                  | 363 ± 313                    | 667 ± 494               | 366 ± 288            |
| 2-Ethylacetate                                              | <b>1147</b>       | 107 ± 78           | 71 ± 35              | 58 ± 39                    | 88 ± 83                      | 53 ± 29                 | 82 ± 83              |
| 2-Methylbutanoic acid methyl ester**                        |                   | 29 ± 12            | 26 ± 10              | 28 ± 29                    | 28 ± 18                      | 23 ± 15                 | 37 ± 44              |
| 3-Hydroxy-2-butanone**                                      |                   | 1 ± 1              | 1 ± 0.4              | 10 ± 27                    | 0.4 ± 0.2                    | 1 ± 2                   | 2 ± 2                |
| Tiglic aldehyde**                                           |                   | 270 ± 197          | 230 ± 154            | 240 ± 240                  | 349 ± 298                    | 195 ± 77                | 373 ± 526            |
| <b>Nitrogen and/or sulphur containing compounds</b>         |                   |                    |                      |                            |                              |                         |                      |
| unknown thiocyanate                                         | <b>871</b>        | 158 ± 124          | 136 ± 102            | 252 ± 270                  | 244 ± 251                    | 175 ± 72                | 146 ± 123            |
| Allyl isothiocyanate                                        | <b>885</b>        | 1594 ± 830         | 1440 ± 826           | 1973 ± 1396                | 1612 ± 1204                  | 1571 ± 248              | 1488 ± 873           |
| Benzyl cyanide                                              | <b>1147</b>       | 1071 ± 1048        | 503 ± 509            | 397 ± 625                  | 739 ± 595                    | 364 ± 371               | 653 ± 687            |
| Benzaldehyde, 2-amino                                       | <b>1235</b>       | 1498 ± 1881        | 597 ± 407            | 581 ± 499                  | 974 ± 761                    | 579 ± 522               | 809 ± 356            |
| Methyl thiocyanate**                                        |                   | 4 ± 3              | 3 ± 2                | 5 ± 4                      | 5 ± 3                        | 3 ± 2                   | 5 ± 4                |
| unknown nitrile m/z 67**                                    |                   | 1180 ± 798         | 1080 ± 440           | 1165 ± 1022                | 1307 ± 946                   | 881 ± 297               | 1008 ± 430           |
| <b>Unknown compounds</b>                                    |                   |                    |                      |                            |                              |                         |                      |
| unknown m/z 134.18                                          | <b>1107</b>       | 35 ± 29            | 25 ± 16              | 17 ± 14                    | 21 ± 15                      | 17 ± 10                 | 23 ± 19              |
| unknown m/z 108.14                                          | <b>1138</b>       | 149 ± 87           | 154 ± 139            | 66 ± 75                    | 127 ± 161                    | 114 ± 94                | 63 ± 38              |
| unknown m/z 150.17                                          | <b>1429</b>       | 28 ± 20            | 16 ± 17              | 9 ± 11                     | 24 ± 23                      | 12 ± 16                 | 19 ± 20              |

\* Calculation of Arithmetic Index (AI) as described by Adams (2001) Identification of Essential Oil Components by Gas Chromatography/Mass Spectrometry. USA: Allured Books.

\*\* We did not calculate the arithmetic index for this compound because the shortest chain linear hydrocarbon we injected was octane

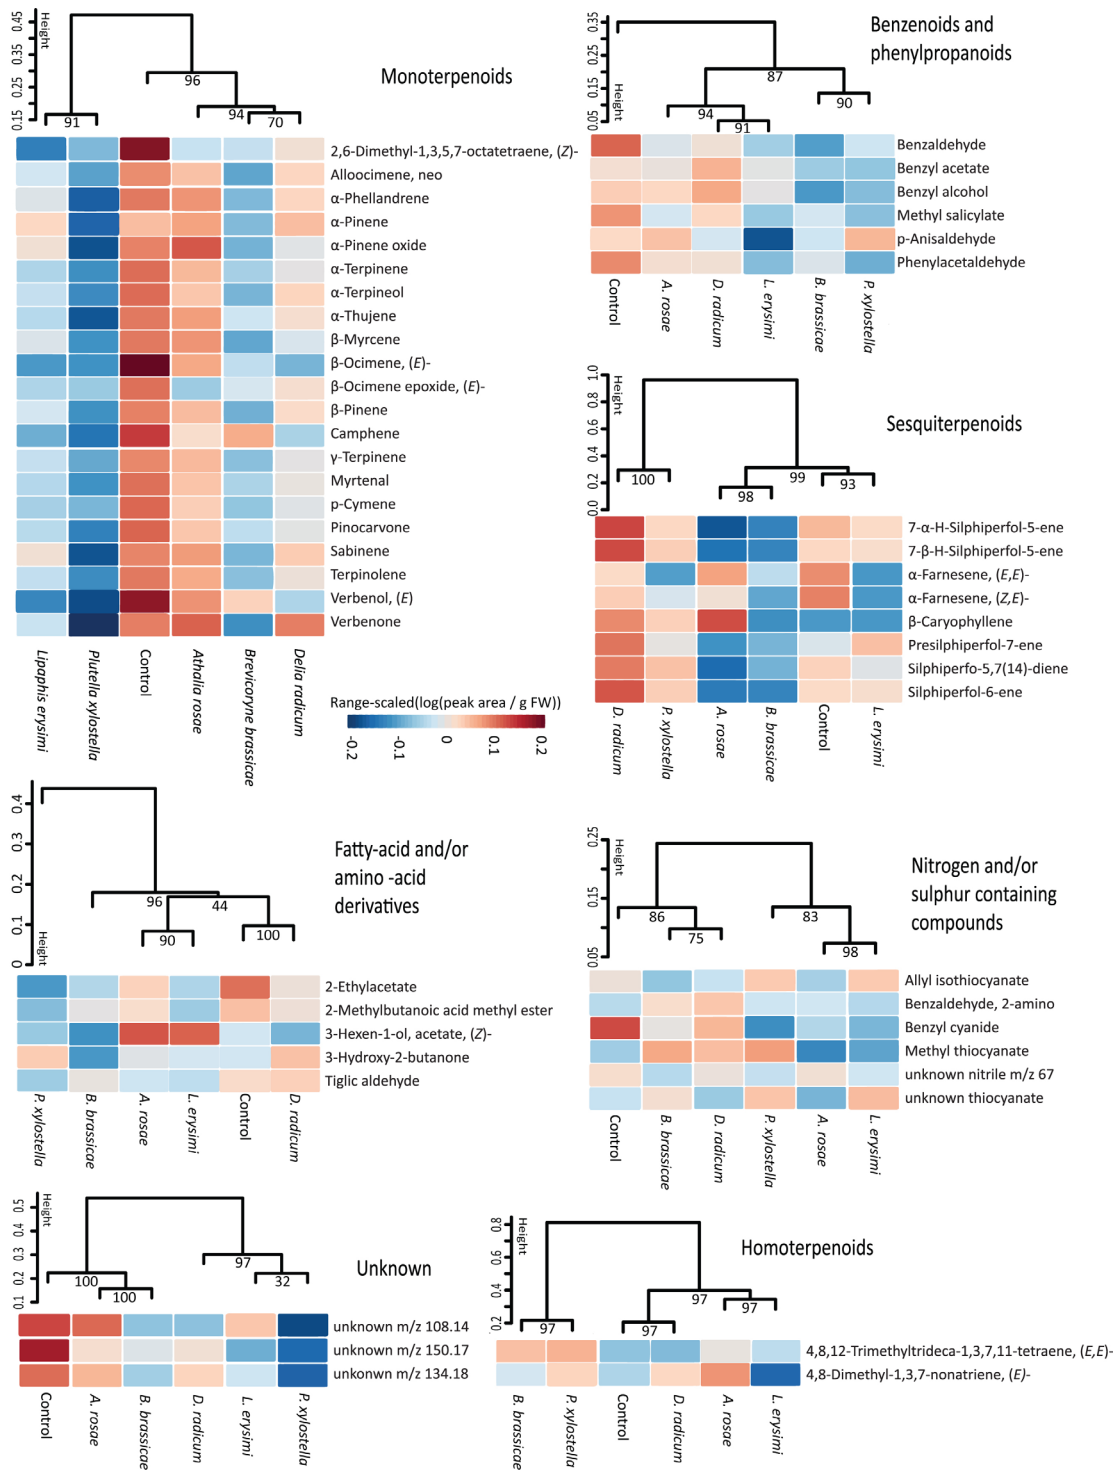

Fig. S7 Dendrogram and heat map of the emission of volatile compounds for each compound class of *Brassica nigra* plants infested with different herbivores or uninfested plants. Dendrogram clustering was performed using Ward's clustering algorithm with Euclidean distances. Values in the dendrogram are approximately unbiased probability values. For the heat map, we used range-scaled log transformed values of volatile emission (peak area / g FW) for each compound. Volatiles were collected after seven days of herbivory. Number of replicates per herbivore treatment varied between seven and nine plants.

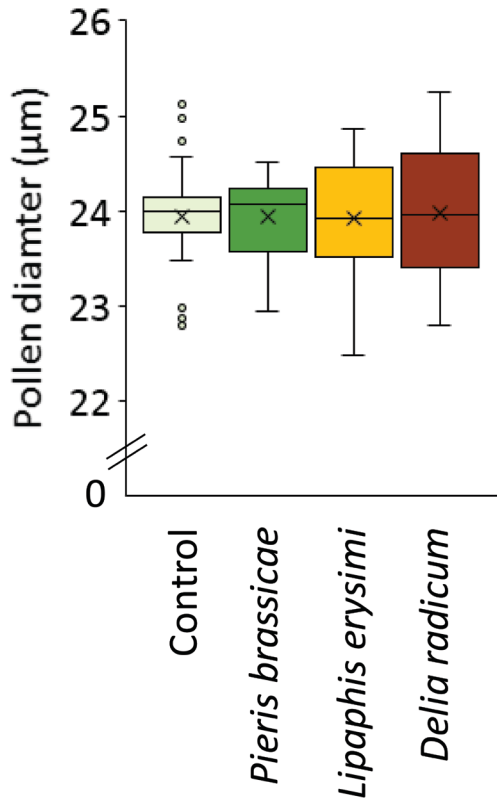

Fig. S8 Size of pollen grains of uninfested *Brassica nigra* plants or plants infested with different herbivores. Boxplots show median (line), mean (x), 1<sup>st</sup> and 3<sup>rd</sup> quartiles, minimum and maximum. Outliers (1.5 times the interquartile range below the 1<sup>st</sup> or above the 3<sup>rd</sup> quartile) are represented by circles. Measurements were done after seven days of herbivory. Number of replicates per herbivore treatment was 10 plants, per plant we measured pollen for five flowers.

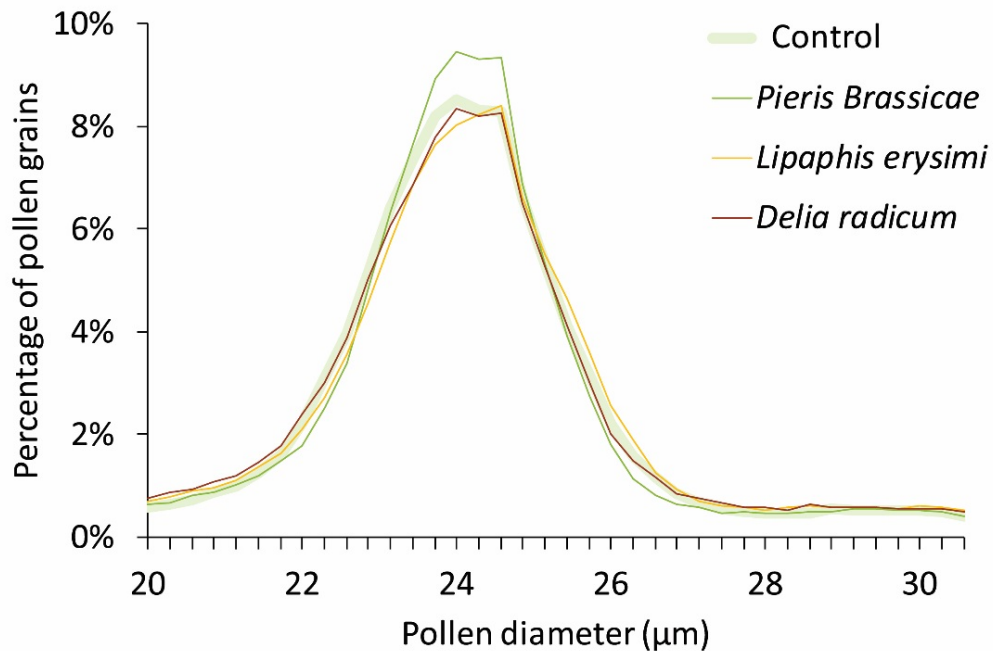

Fig. S9 Size distribution of pollen grains of uninfested *Brassica nigra* plants or plants infested with different herbivores. Measurements were done after seven days of herbivory. Number of replicates per herbivore treatment was 10 plants, per plant we measured pollen for five flowers.

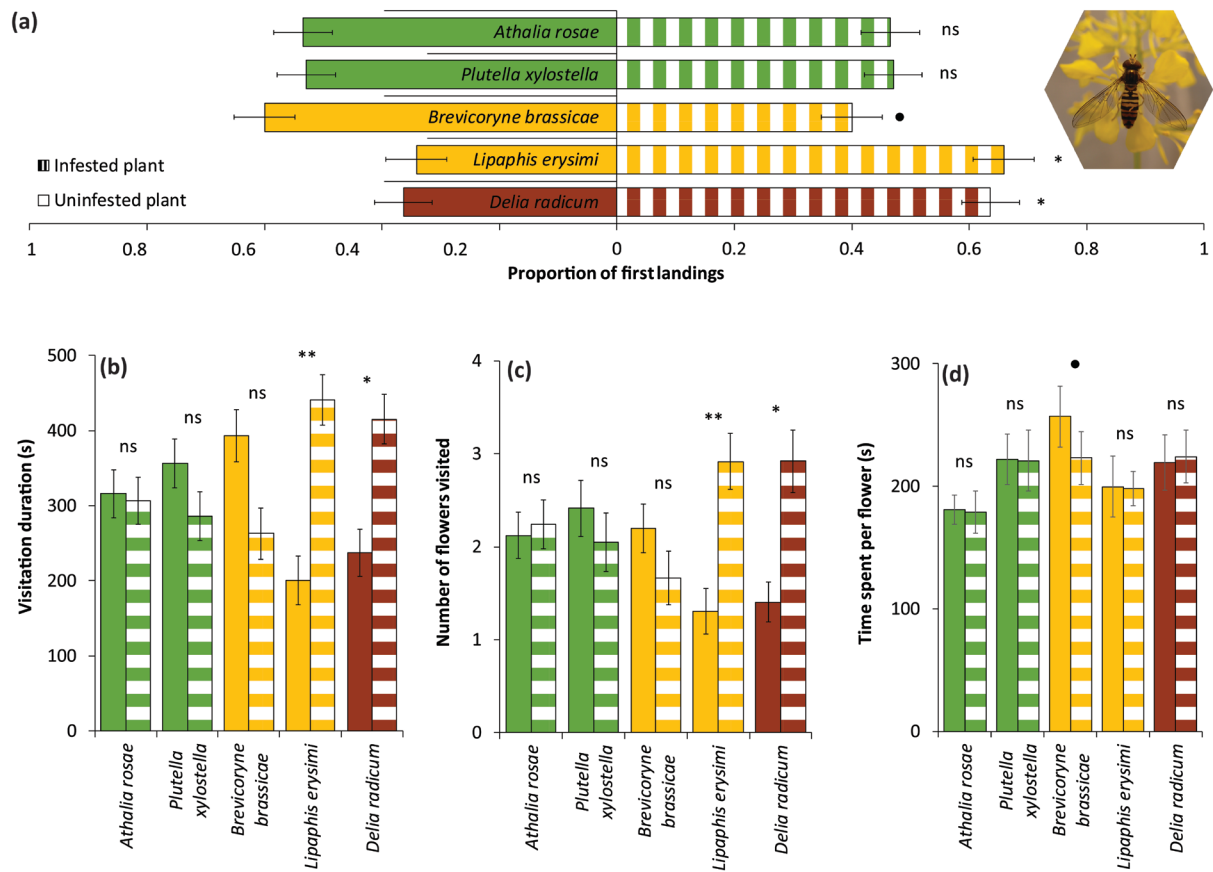

Fig. S10 Preference of the syrphid fly *Episyrphus balteatus* for uninfested *Brassica nigra* plants or plants infested with different herbivores. (a) Proportion of *E. balteatus* syrphid flies (mean  $\pm$  SE) that first landed on flowers or leaves of *Brassica nigra* plants infested with different herbivores or uninfested plants. (b) Visitation duration (mean  $\pm$  SE); (c) number of flowers visited (mean  $\pm$  SE); and (d) time spent per flower (mean  $\pm$  SE) by individual pollinators on infested or uninfested *B. nigra* plants. Syrphid fly behavior was assessed after seven days of herbivory. Number of replicates per herbivore treatment varied between 85 and 102 syrphid flies, and 9 and 11 plant pairs. Asterisks above bars indicate significant differences with \*\*\* =  $P < 0.001$ , \*\* =  $0.001 \geq P < 0.01$ , \* =  $0.01 \geq P \leq 0.05$ , and • =  $0.05 > P < 0.1$ , based on Tukey's *post hoc* tests. Photograph shows an *E. balteatus* syrphid fly visiting flowers of *B. nigra*. Photograph credit: Quint Rusman.
